# Supplementary material
Source: PubMed Central journal article supplement (PMC7745433)
Supplement: ao0c04489_si_001.pdf [file ao0c04489_si_001.pdf]

Supporting Information

*Melissa officinalis* Extract Induces Apoptosis and Inhibits Migration in Human Colorectal Cancer Cells

*Tzu-Ting Kuo,<sup>1, //</sup> Hsin-Yi Chang,<sup>2,3, //</sup> Tai-Yuan Chen,<sup>4</sup> Bai-Chia Liu,<sup>3</sup> Hsin-Yi Chen,<sup>1,3</sup> Yuan-Chin Hsiung,<sup>5</sup> Shih-Min Hsia,<sup>6</sup> Chun-Ju Chang,<sup>4, \*</sup> and Tsui-Chin Huang<sup>1,3,7,8, \*</sup>*

<sup>1</sup> Ph.D. Program for Cancer Molecular Biology and Drug Discovery, College of Medical Science and Technology, Taipei Medical University and Academia Sinica, Taipei 11031, Taiwan

<sup>2</sup> Graduate Institute of Metabolism and Obesity Sciences, College of Nutrition, Taipei Medical University, Taipei 11031, Taiwan

<sup>3</sup> Graduate Institute of Cancer Biology and Drug Discovery, College of Medical Science and Technology, Taipei Medical University, Taipei 11031, Taiwan

<sup>4</sup> Department of Food Science, National Taiwan Ocean University, Keelung 20224, Taiwan

<sup>5</sup> TMU Core Facility Center, Taipei Medical University, Taipei 11031, Taiwan

<sup>6</sup> School of Nutrition and Health Sciences, College of Nutrition, Taipei Medical University, Taipei 11031, Taiwan

<sup>7</sup> TMU Research Center of Cancer Translational Medicine, Taipei Medical University, Taipei 11031, Taiwan

<sup>8</sup> Cancer Center, Wan Fang Hospital, Taipei Medical University, Taipei 11696, Taiwan

\* Corresponding Authors

E-mail addresses: T.-T. K., [d621107003@tmu.edu.tw](mailto:d621107003@tmu.edu.tw); H.-Y.C., [hsinyi.chang@tmu.edu.tw](mailto:hsinyi.chang@tmu.edu.tw); T.-Y. C., [tychen@mail.ntou.edu.tw](mailto:tychen@mail.ntou.edu.tw); B.-C. L., [deamily@gmail.com](mailto:deamily@gmail.com); H.-Y. C., [hyichen@tmu.edu.tw](mailto:hyichen@tmu.edu.tw); C.-J. Chang, [chunju@ntou.edu.tw](mailto:chunju@ntou.edu.tw); T.-C. H., [tsuichin@tmu.edu.tw](mailto:tsuichin@tmu.edu.tw)

**Table S1.** Compounds identified in the hot water extract of *Melissa officinalis* in MS<sup>E</sup>-negative ionization mode.

| RT<br>(min) | m/z      | Formula                                         | Score | Mass Error<br>(ppm) | Identified Compound                 |
|-------------|----------|-------------------------------------------------|-------|---------------------|-------------------------------------|
| 0.84        | 827.2680 | C <sub>30</sub> H <sub>52</sub> O <sub>26</sub> | 43.5  | 0.68                | Maltopentaose                       |
| 0.91        | 195.0510 | C <sub>6</sub> H <sub>12</sub> O <sub>7</sub>   | 42.8  | 0.06                | Gluconic acid                       |
| 0.91        | 503.1615 | C <sub>18</sub> H <sub>32</sub> O <sub>16</sub> | 43.1  | -0.61               | Raffinose                           |
| 0.91        | 701.1903 | C <sub>24</sub> H <sub>42</sub> O <sub>21</sub> | 41.1  | -1.39               | Maltotetraose                       |
| 8.68        | 447.0925 | C <sub>21</sub> H <sub>20</sub> O <sub>11</sub> | 45.9  | -1.74               | Chrysanthemine                      |
| 10.09       | 197.0455 | C <sub>9</sub> H <sub>10</sub> O <sub>5</sub>   | 39.8  | -0.37               | 2-Hydroxy-3,4-dimethoxybenzoic acid |
| 10.09       | 313.0707 | C <sub>17</sub> H <sub>14</sub> O <sub>6</sub>  | 38.9  | -3.50               | Koparin 2'-methyl ether             |
| 10.09       | 357.0601 | C <sub>18</sub> H <sub>14</sub> O <sub>8</sub>  | 39.2  | -4.11               | Psoromic acid                       |
| 10.09       | 359.0770 | C <sub>18</sub> H <sub>16</sub> O <sub>8</sub>  | 48.4  | -0.79               | Rosmarinate                         |
| 10.09       | 715.1301 | C <sub>36</sub> H <sub>28</sub> O <sub>16</sub> | 38.2  | -0.56               | Theaflavin monogallates             |

RT: retention time (minutes)

**Table S2.** Compounds identified in the hot water extract of *Melissa officinalis* in MS<sup>E</sup>-positive ionization mode.

| RT<br>(min) | m/z      | Formula                                                                      | Score | Mass Error<br>(ppm) | Identified Compound                        |
|-------------|----------|------------------------------------------------------------------------------|-------|---------------------|--------------------------------------------|
| 0.84        | 705.1852 | C <sub>36</sub> H <sub>32</sub> O <sub>15</sub>                              | 35.9  | 5.40                | Occidentoside                              |
| 0.91        | 325.1137 | C <sub>19</sub> H <sub>17</sub> ClN <sub>2</sub> O                           | 32.3  | 10.74               | Prazepam                                   |
| 0.91        | 353.0912 | C <sub>16</sub> H <sub>17</sub> ClN <sub>2</sub> O <sub>5</sub>              | 39.9  | 3.76                | N-(Carbethoxyacetyl)-4-chloro-L-tryptophan |
| 0.91        | 365.1039 | C <sub>12</sub> H <sub>22</sub> O <sub>11</sub>                              | 40.3  | -4.44               | D-(+)-Turannose                            |
| 0.91        | 434.1189 | C <sub>21</sub> H <sub>21</sub> O <sub>10</sub> <sup>+</sup>                 | 34.6  | -4.19               | Luteolinidin 3-O-glucoside                 |
| 0.91        | 443.1227 | C <sub>17</sub> H <sub>22</sub> N <sub>4</sub> O <sub>8</sub> S              | 38.3  | -0.96               | S-(4-Nitrobenzyl)glutathione               |
| 0.91        | 487.1638 | C <sub>17</sub> H <sub>30</sub> N <sub>2</sub> O <sub>12</sub> S             | 33.5  | 9.44                | Mycothioli                                 |
| 0.91        | 527.1582 | C <sub>18</sub> H <sub>32</sub> O <sub>16</sub>                              | 36.6  | -0.20               | Maltotriose                                |
| 7.25        | 285.0767 | C <sub>16</sub> H <sub>12</sub> O <sub>5</sub>                               | 49.7  | 3.22                | Thevetiaflavone                            |
| 7.25        | 311.0568 | C <sub>17</sub> H <sub>10</sub> O <sub>6</sub>                               | 49.8  | 5.60                | Maximaisoflavone A                         |
| 7.25        | 369.0303 | C <sub>10</sub> H <sub>13</sub> N <sub>2</sub> O <sub>11</sub> P             | 37    | -7.21               | Orotidine, 5'-phosphate (OMP)              |
| 7.25        | 509.1082 | C <sub>26</sub> H <sub>20</sub> O <sub>11</sub>                              | 45.3  | 0.66                | Fluorescein monoglucuronide                |
| 7.25        | 537.1026 | C <sub>27</sub> H <sub>20</sub> O <sub>12</sub>                              | 41.7  | -0.29               | Sagecoumarin                               |
| 7.29        | 481.1139 | C <sub>25</sub> H <sub>20</sub> O <sub>10</sub>                              | 43.7  | 1.98                | 2,3-Dehydrosilychristin                    |
| 8.06        | 625.1419 | C <sub>27</sub> H <sub>28</sub> O <sub>17</sub>                              | 44.2  | 3.13                | Kaempferol 3-glucuronide-7-glucoside       |
| 10.09       | 181.0514 | C <sub>9</sub> H <sub>8</sub> O <sub>4</sub>                                 | 53.8  | 10.10               | 3-(3,5-Dihydroxyphenyl)-2-propenoic acid   |
| 10.09       | 232.0294 | C <sub>10</sub> H <sub>11</sub> Cl <sub>2</sub> NO                           | 31    | 1.71                | 2,4-dichloro-N-propylbenzamide             |
| 10.09       | 237.0085 | C <sub>5</sub> H <sub>8</sub> N <sub>4</sub> O <sub>3</sub> S <sub>2</sub>   | 38.1  | -10.73              | Methazolamide                              |
| 10.09       | 278.0351 | C <sub>9</sub> H <sub>11</sub> NO <sub>7</sub> S                             | 37.2  | 8.00                | DOPA sulfate                               |
| 10.09       | 343.0827 | C <sub>18</sub> H <sub>14</sub> O <sub>7</sub>                               | 41.1  | 4.36                | Phyllocoumarin                             |
| 10.09       | 357.0582 | C <sub>18</sub> H <sub>12</sub> O <sub>8</sub>                               | 38.4  | -6.42               | Xerocomic acid                             |
| 10.09       | 361.0930 | C <sub>18</sub> H <sub>16</sub> O <sub>8</sub>                               | 43.4  | 3.26                | Rosmarinate                                |
| 10.09       | 385.0526 | C <sub>15</sub> H <sub>16</sub> N <sub>2</sub> O <sub>6</sub> S <sub>2</sub> | 40.4  | 0.95                | Ticarcillin                                |
| 10.09       | 455.0300 | C <sub>20</sub> H <sub>16</sub> Cl <sub>2</sub> O <sub>8</sub>               | 31    | 1.02                | Gangleoidin acetate                        |
| 10.09       | 521.1051 | C <sub>27</sub> H <sub>20</sub> O <sub>11</sub>                              | 37.8  | -5.22               | Melitic acid B                             |
| 10.09       | 523.1228 | C <sub>25</sub> H <sub>24</sub> O <sub>11</sub>                              | 38.1  | 3.49                | Epicatechin pentaacetate                   |
| 10.09       | 721.1778 | C <sub>36</sub> H <sub>32</sub> O <sub>16</sub>                              | 37.8  | 2.01                | Sagerinic acid                             |
| 10.23       | 463.0877 | C <sub>21</sub> H <sub>18</sub> O <sub>12</sub>                              | 47.4  | 1.36                | Kaempferol 3-glucuronide                   |
| 11.19       | 323.0571 | C <sub>18</sub> H <sub>10</sub> O <sub>6</sub>                               | 46.3  | 6.41                | 7,7'-Dihydroxy-6,8'-bicoumarin             |
| 11.23       | 341.0664 | C <sub>18</sub> H <sub>12</sub> O <sub>7</sub>                               | 53.7  | 2.42                | Salvianolic acid D                         |

RT: retention time (minutes)

**Table S3.** Compounds identified in the hot water extract of *Melissa officinalis* in survey-negative ionization mode.

| RT<br>(min) | m/z      | Formula                                                                      | Score | Mass Error<br>(ppm) | Identified Compound       |
|-------------|----------|------------------------------------------------------------------------------|-------|---------------------|---------------------------|
| 0.86        | 701.1906 | C <sub>24</sub> H <sub>42</sub> O <sub>21</sub>                              | 46.1  | -0.27               | Stachyose                 |
| 0.86        | 195.0512 | C <sub>6</sub> H <sub>12</sub> O <sub>7</sub>                                | 40.5  | 0.78                | Gluconic acid             |
| 0.95        | 179.0554 | C <sub>6</sub> H <sub>12</sub> O <sub>6</sub>                                | 39.9  | -3.90               | myo-Inositol              |
| 0.95        | 341.1082 | C <sub>12</sub> H <sub>22</sub> O <sub>11</sub>                              | 41.3  | -2.13               | D-Lactose                 |
| 0.95        | 503.1608 | C <sub>18</sub> H <sub>32</sub> O <sub>16</sub>                              | 38.2  | -1.86               | Raffinose                 |
| 1.29        | 191.0201 | C <sub>6</sub> H <sub>8</sub> O <sub>7</sub>                                 | 48.1  | 1.92                | Citric acid               |
| 3.16        | 197.0456 | C <sub>9</sub> H <sub>10</sub> O <sub>5</sub>                                | 41.8  | -0.45               | Vanillylmandelic acid     |
| 5.93        | 305.0695 | C <sub>15</sub> H <sub>14</sub> O <sub>7</sub>                               | 37    | 9.33                | Epigallocatechin          |
| 5.94        | 179.0345 | C <sub>9</sub> H <sub>8</sub> O <sub>4</sub>                                 | 41.6  | -2.48               | Aspirin                   |
| 8.69        | 447.0927 | C <sub>21</sub> H <sub>20</sub> O <sub>11</sub>                              | 35.7  | -1.38               | Petunidin-3-O-arabinoside |
| 8.80        | 521.1291 | C <sub>24</sub> H <sub>26</sub> O <sub>13</sub>                              | 41.2  | -1.77               | Centaurein                |
| 9.90        | 187.0977 | C <sub>9</sub> H <sub>16</sub> O <sub>4</sub>                                | 39.3  | 0.63                | Nonic acid                |
| 10.08       | 359.0771 | C <sub>18</sub> H <sub>16</sub> O <sub>8</sub>                               | 54    | -0.44               | Rosmarinate               |
| 10.19       | 461.0723 | C <sub>18</sub> H <sub>18</sub> N <sub>6</sub> O <sub>5</sub> S <sub>2</sub> | 37.1  | 3.44                | Cefamandole               |
| 11.29       | 343.0821 | C <sub>18</sub> H <sub>16</sub> O <sub>7</sub>                               | 37.9  | -0.60               | Eupatorin                 |
| 11.54       | 453.1174 | C <sub>23</sub> H <sub>22</sub> N <sub>2</sub> O <sub>6</sub> S              | 35.6  | 10.65               | Nap-Met-OH                |
| 12.76       | 715.1331 | C <sub>36</sub> H <sub>28</sub> O <sub>16</sub>                              | 38.4  | 3.74                | Theaflavin monogallates   |

RT: retention time (minutes)

**Table S4.** Compounds identified in the hot water extract of *Melissa officinalis* in survey-positive ionization mode.

| RT<br>(min) | m/z      | Formula                                                                    | Score | Mass Error<br>(ppm) | Identified Compound                                 |
|-------------|----------|----------------------------------------------------------------------------|-------|---------------------|-----------------------------------------------------|
| 0.86        | 381.0808 | C <sub>14</sub> H <sub>20</sub> O <sub>10</sub> S                          | 36.4  | -11.13              | 4-Methoxybenzyl O-(2-sulfoglucoside)                |
| 0.95        | 248.1145 | C <sub>10</sub> H <sub>17</sub> NO <sub>6</sub>                            | 38.7  | 6.55                | Linamarin                                           |
| 0.95        | 281.0700 | C <sub>11</sub> H <sub>12</sub> N <sub>4</sub> O <sub>3</sub> S            | 38.7  | -1.11               | Sulfamethopyrazine                                  |
| 1.27        | 224.1295 | C <sub>12</sub> H <sub>17</sub> NO <sub>3</sub>                            | 36    | 6.19                | Cerulenin                                           |
| 1.32        | 274.0953 | C <sub>12</sub> H <sub>19</sub> NO <sub>2</sub> S <sub>2</sub>             | 37.7  | 8.34                | Brugine                                             |
| 1.37        | 268.1061 | C <sub>10</sub> H <sub>13</sub> N <sub>5</sub> O <sub>4</sub>              | 48.4  | 7.90                | Adenosine                                           |
| 3.20        | 237.0094 | C <sub>5</sub> H <sub>8</sub> N <sub>4</sub> O <sub>3</sub> S <sub>2</sub> | 35.7  | -7.06               | Methazolamide                                       |
| 4.35        | 163.0402 | C <sub>9</sub> H <sub>6</sub> O <sub>3</sub>                               | 47.6  | 7.78                | Umbelliferone                                       |
| 5.47        | 195.0784 | C <sub>14</sub> H <sub>10</sub> O                                          | 35.7  | -10.35              | 1-Phenanthrol                                       |
| 5.99        | 163.0400 | C <sub>9</sub> H <sub>6</sub> O <sub>3</sub>                               | 40.4  | 6.50                | 3-Hydroxycoumarin                                   |
| 7.24        | 311.0567 | C <sub>17</sub> H <sub>10</sub> O <sub>6</sub>                             | 50    | 5.45                | Maximaisoflavone A                                  |
| 8.83        | 163.0401 | C <sub>9</sub> H <sub>6</sub> O <sub>3</sub>                               | 47.2  | 6.91                | 4-Hydroxycoumarin                                   |
| 9.07        | 197.1190 | C <sub>11</sub> H <sub>16</sub> O <sub>3</sub>                             | 48.3  | 8.84                | Benzenemethanol, 2-(2-hydroxypropoxy)-3-methyl-     |
| 10.11       | 181.0510 | C <sub>9</sub> H <sub>8</sub> O <sub>4</sub>                               | 48.9  | 8.34                | Phenylmalonic acid                                  |
| 10.11       | 278.0346 | C <sub>9</sub> H <sub>11</sub> NO <sub>7</sub> S                           | 37.1  | 5.99                | DOPA sulfate                                        |
| 10.20       | 287.0564 | C <sub>15</sub> H <sub>10</sub> O <sub>6</sub>                             | 37.6  | 5.01                | Maritimetin                                         |
| 10.20       | 463.0881 | C <sub>21</sub> H <sub>18</sub> O <sub>12</sub>                            | 47.1  | 2.11                | Kaempferol 3-glucuronide                            |
| 11.06       | 469.3316 | C <sub>30</sub> H <sub>44</sub> O <sub>4</sub>                             | 43    | 0.68                | 16beta-16-Hydroxy-3-oxo-1,12-oleanadien-28-oic acid |
| 11.18       | 323.0551 | C <sub>15</sub> H <sub>14</sub> O <sub>6</sub> S                           | 36.7  | -10.14              | GN25                                                |
| 11.18       | 341.0668 | C <sub>18</sub> H <sub>12</sub> O <sub>7</sub>                             | 52.3  | 3.68                | Salvianolic acid D                                  |

RT: retention time (minutes)

**Table S5.** Classification of MO-extract compounds

| <b>Superclass</b>                        | <b>Identified Compound</b>                          |
|------------------------------------------|-----------------------------------------------------|
| Alkaloids                                | Brugine                                             |
| Benzenoids                               | Sulfamethopyrazine                                  |
|                                          | 2,4-dichloro-N-propylbenzamide                      |
|                                          | 2-Hydroxy-3,4-dimethoxybenzoic acid                 |
|                                          | Aspirin                                             |
|                                          | Phenylmalonic acid                                  |
|                                          | GN25                                                |
|                                          | 1-Phenanthrol                                       |
|                                          | Benzenemethanol, 2-(2-hydroxypropoxy)-3-methyl-     |
|                                          | Xerocomic acid                                      |
| Lipids and lipid-like molecules (Lipids) | Nonic acid                                          |
|                                          | 16beta-16-Hydroxy-3-oxo-1,12-oleanadien-28-oic acid |
| Nucleotides                              | Adenosine                                           |
|                                          | Orotidine, 5'-phosphate (OMP)                       |
| Organic acids and derivatives            | DOPA sulfate                                        |
|                                          | N-(Carbethoxyacetyl)-4-chloro-L-tryptophan          |
|                                          | Nap-Met-OH                                          |
|                                          | S-(4-Nitrobenzyl)glutathione                        |
|                                          | Ticarcillin                                         |
|                                          | Citric acid                                         |
|                                          | Gluconic acid                                       |
| Organic oxygen compounds (Sugars)        | myo-Inositol                                        |
|                                          | 4-Methoxybenzyl O-(2-sulfoglucoside)                |
|                                          | D-(+)-Turannose                                     |
|                                          | D-Lactose                                           |
|                                          | Fluorescein monoglucuronide                         |
|                                          | Linamarin                                           |
|                                          | Maltopentaose                                       |
|                                          | Maltotetraose                                       |
|                                          | Maltotriose                                         |
|                                          | Mycothioli                                          |
| Raffinose                                |                                                     |
| Stachyose                                |                                                     |
| Organoheterocyclic compounds             | Methazolamide                                       |

|                                  |                                                     |                |
|----------------------------------|-----------------------------------------------------|----------------|
|                                  | Prazepam                                            |                |
|                                  | Salvianolic acid D                                  |                |
|                                  | Ceruleinin                                          |                |
|                                  | Cefamandole                                         |                |
|                                  | 2,3-Dehydrosilychristin                             |                |
|                                  | Maritimetin                                         |                |
|                                  | 3-(3,5-Dihydroxyphenyl)-2-propenoic acid            |                |
|                                  | Melitric acid B                                     |                |
|                                  | Rosmarinate (Rosmarinic Acid)                       |                |
|                                  | 3-Hydroxycoumarin                                   |                |
|                                  | 4-Hydroxycoumarin                                   |                |
|                                  | 7,7'-Dihydroxy-6,8'-bicycoumarin                    |                |
|                                  | Sagecoumarin                                        |                |
|                                  | Umbelliferone                                       |                |
|                                  | Gangleoidin acetate                                 |                |
|                                  | Psoromic acid                                       |                |
| Phenylpropanoids and polyketides | Epicatechin pentaacetate                            |                |
|                                  | Epigallocatechin                                    |                |
|                                  | Phyllocoumarin                                      |                |
|                                  | Theaflavin monogallates                             |                |
|                                  | Centaurein                                          |                |
|                                  | Chrysanthemine                                      |                |
|                                  | Kaempferol 3-glucuronide                            |                |
|                                  | Kaempferol 3-glucuronide-7-glucoside                |                |
|                                  | Luteolinidin 3-O-glucoside                          |                |
|                                  | Petunidin-3-O-arabinoside                           |                |
|                                  | Eupatorin                                           |                |
|                                  | Thevetiaflavone                                     |                |
|                                  | Maximaisoflavone A                                  |                |
|                                  | Koparin 2'-methyl ether                             |                |
|                                  | Lignans, neolignans and related compounds (Lignans) | Sagerinic acid |
|                                  |                                                     | Occidentoside  |
